# Supplementary material
Source: PubMed Central journal article supplement (PMC1748197)

BIC+SAC +  
daily Ro 25-1553

PTX +  
daily Ro 25-1553

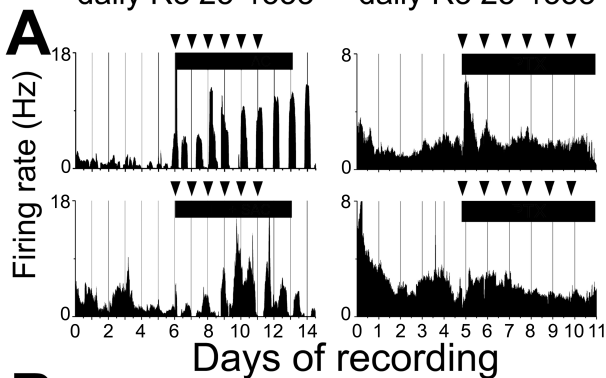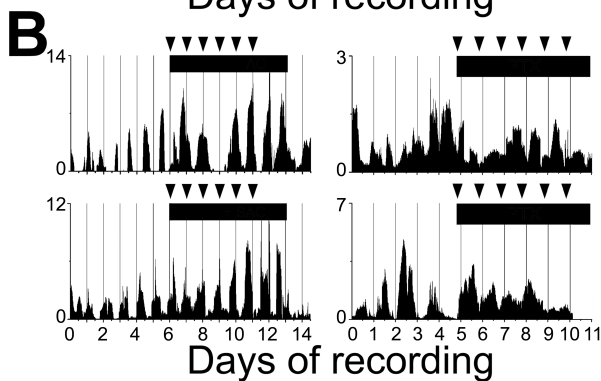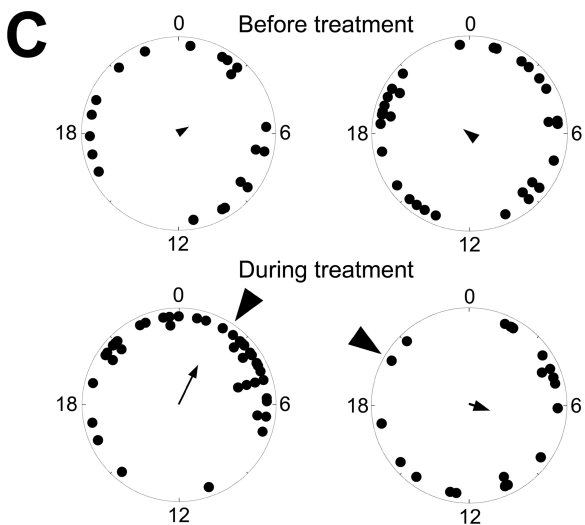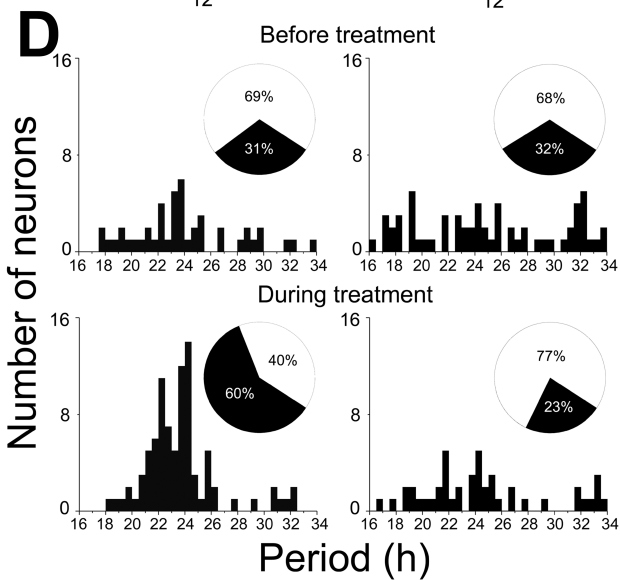

Supplement: pnas_0607466103_4.pdf [file pnas_0607466103_4.pdf]
